# Supplementary material for: Evaluating an exponential respiration model to alternative models for soil respiration components in a Canadian wildfire chronosequence (FireResp, v1.0)
Source: Copernicus journal article supplement (doi:10.5194/gmd-2021-185), 2021-07-01
Supplement: Supplementary file [file gmd-2021-185-AC1-supplement.pdf]

For this revision we have implemented the empirical function of soil moisture limitation described in Moyano et al. (2013), where  $r(fW) = 3.11 fW - 2.42 fW^2$ , which shows anoxia at higher soil moisture proportions. We compare this new implementation (red curve below) to the linear scaling below (blue line below):

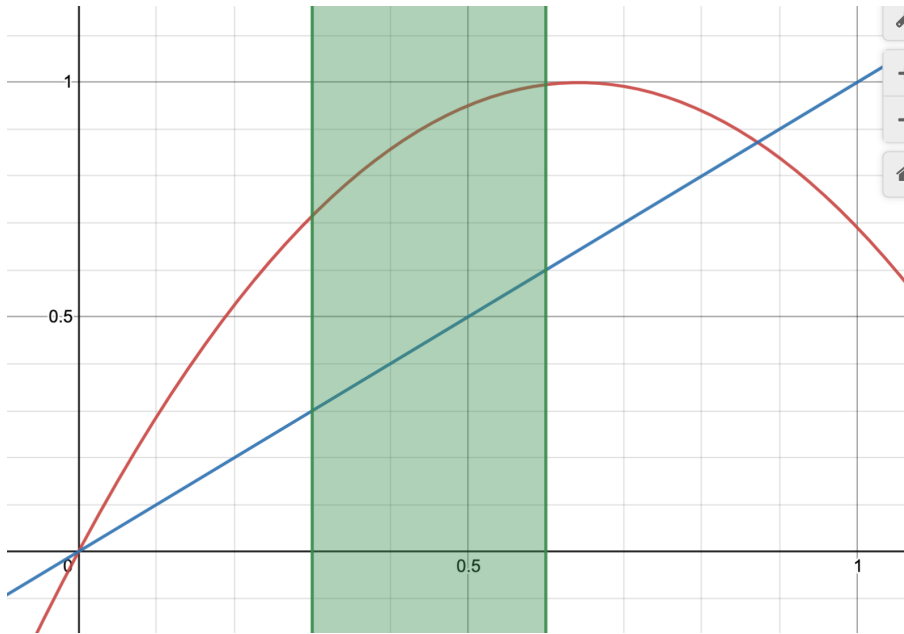

The green shading represents the range of soil moisture proportions found in our sites (Table 1).
